# Supplementary material
Source: PubMed Central journal article supplement (PMC6613122)
Supplement: s-26-00967-sup1.pdf [file s-26-00967-sup1.pdf]

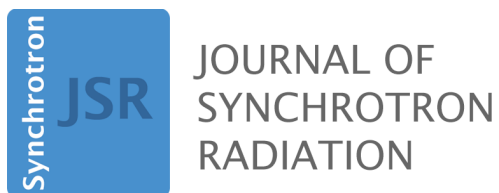

**Volume 26 (2019)**

**Supporting information for article:**

**Structural consequences on transforming growth factor beta-1  
activation from near-therapeutic X-ray doses**

**Timothy Stachowski, Thomas D. Grant and Edward H. Snell**

**Table S1** Experimentally determined parameters from SAXS analysis of LTGF $\beta$ -1 and LAP

## (a) Sample Details

| Sample                                           | LTGF $\beta$ -1     | LAP                 |
|--------------------------------------------------|---------------------|---------------------|
| Organism                                         | <i>Homo sapiens</i> | <i>Homo sapiens</i> |
| Source                                           | HEK293              | HEK293              |
| UniProt sequence ID (residues in construct)      | P01137 (1-390)      | P01137(1-278)       |
| Extinction coefficient [ $A_{280}$ , 0.1% (w/v)] | 1.338               | 0.977               |
| $M$ from chemical composition (Da)               | ~95000              | ~70000              |
| Average $C$ in combined frames (mg ml $^{-1}$ )  | 1.0                 | 4.5                 |

## (b) SAXS data-collection parameters

|                                           |                                                                                         |
|-------------------------------------------|-----------------------------------------------------------------------------------------|
| Instrument/data processing                | Advanced Light Source SIBYLS SAXS beamline with 2M detector (Dyer <i>et al.</i> , 2014) |
| Wavelength ( $\text{\AA}$ )               | 1.127                                                                                   |
| Camera length (m)                         | 2                                                                                       |
| $q$ measurement ( $\text{\AA}^{-1}$ )     | 0.0114-0.40156                                                                          |
| Monitoring for radiation damage           | X-ray dose maintained below 250 Gy, data frame-by-frame comparison                      |
| Exposure time                             | Continuous 0.1 s data-frame measurements of static sample                               |
| Sample configuration                      | Static sample cell                                                                      |
| Sample temperature ( $^{\circ}\text{C}$ ) | 10                                                                                      |

## (c) Software employed for SAXS data reduction, analysis, and interpretation

|                                                |                                                                                |
|------------------------------------------------|--------------------------------------------------------------------------------|
| SAXS data reduction                            | Solvent subtraction using PRIMUSqt (ATSAS 2.8.3 (Franke <i>et al.</i> , 2017)) |
| Extinction coefficient                         | ProtParam (Gasteiger <i>et al.</i> , 2005)                                     |
| Basic analyses: Guinier, $P(r)$ , $V_p$        | PRIMUSqt (ATSAS 2.8.3 (Franke <i>et al.</i> , 2017))                           |
| Atomic structure modelling                     | CRY SOL from PRIMUSqt in ATSAS 2.8.3, EOM 2.1 (Tria <i>et al.</i> , 2015)      |
| Missing sequence modelling                     | MODELLER via Chimera (Yang <i>et al.</i> , 2012)                               |
| Three-dimensional graphic model representation | Chimera v.1.11.2 MacOS                                                         |

## (d) Sample Details

| Sample                          | LTGFB-1         | LAP             |
|---------------------------------|-----------------|-----------------|
| Guinier Analysis                |                 |                 |
| $I(0)$ (arbitrary units)        | 6.72 +/- 0.017  | 27.96 +/- 0.087 |
| $R_g$ (Å)                       | 38.3 +/- 0.53   | 40.71 +/- 0.09  |
| $q$ min (Å <sup>-1</sup> )      | 0.012           | 0.0114          |
| $qR_g$ max                      | 1.29            | 1.3             |
| $P(r)$ analysis                 |                 |                 |
| $I(0)$ (arbitrary units)        | 6.80 +/- 0.027  | 28.63 +/- 0.097 |
| $R_g$ (Å)                       | 40.60 +/- 0.363 | 43.60 +/- 0.271 |
| $D_{max}$ (Å)                   | 175             | 175             |
| $q$ range (Å <sup>-1</sup> )    | 0.0120-0.4016   | 0.0114-0.401    |
| Porod volume (Å <sup>-3</sup> ) | 206000          | 178000          |

## (e) Atomistic modelling

| Sample                                                                                                                         | LTGFβ-1             | LAP                        |
|--------------------------------------------------------------------------------------------------------------------------------|---------------------|----------------------------|
| Crystal structure                                                                                                              | PDB: 3RJR           | PDB: 3RJR (LAP domain)     |
| $q$ range for all modelling                                                                                                    | 0.0120-0.4016       | 0.0114-0.401               |
| CRY SOL (with default parameters)                                                                                              |                     |                            |
| $\chi^2$ (unglycosylated, glycosylated)                                                                                        | 95.0, 3.46          | 147.35, 17.41              |
| Predicted $R_g$ (Å) (unglycosylated, glycosylated)                                                                             | 29.58, 35.23        | 30.94, 35.41               |
| Vol (Å <sup>3</sup> ), Ra (Å), Dro (e Å <sup>-3</sup> )                                                                        | 10349, 1.800, 0.020 | 74723, 1.800, 0.020        |
| Multistate/ensemble models (EOM, default parameters, 30,000 models in initial pool, native-like, constant subtraction allowed) |                     |                            |
| $\chi^2$                                                                                                                       |                     | 6.79                       |
| Starting crystal structure                                                                                                     |                     | PDB: 3RJR (LAP domain)     |
| Flexible residues                                                                                                              |                     | 1-45                       |
| Number of states                                                                                                               |                     | 4                          |
| Volume fraction of each state                                                                                                  |                     | 0.222, 0.111, 0.222, 0.444 |
| $R_g$ value of each state                                                                                                      |                     | 36.17, 38.04, 39.88, 38.26 |
| Overall $R_g$                                                                                                                  |                     | 38.13                      |
| Overall $D_{max}$                                                                                                              |                     | 144.96                     |
| GLYCOSYLATION                                                                                                                  |                     |                            |
| Total number of glycans                                                                                                        | 6                   | 6                          |
| Amino acids with glycans                                                                                                       | N53, N107, N147     | N53, N107, N147            |
| Type of glycans                                                                                                                | complex             | complex                    |
| Total mass of glycans                                                                                                          | 11217.8             | 11217.8                    |

**Table S2** Parameters for X-ray diffraction weighted dose calculations using RADDOSE-3D

|                                        |                           |
|----------------------------------------|---------------------------|
| Flux                                   | $1.2 \times 10^{12}$ ph/s |
| Sample container                       | 20 $\mu$ m mica window    |
| Attenuation by<br>sample container (%) | 10                        |
| Beam type                              | Top-hat                   |
| Beam size                              | 1 mm $\times$ 2 mm        |
| Energy                                 | 11 keV                    |

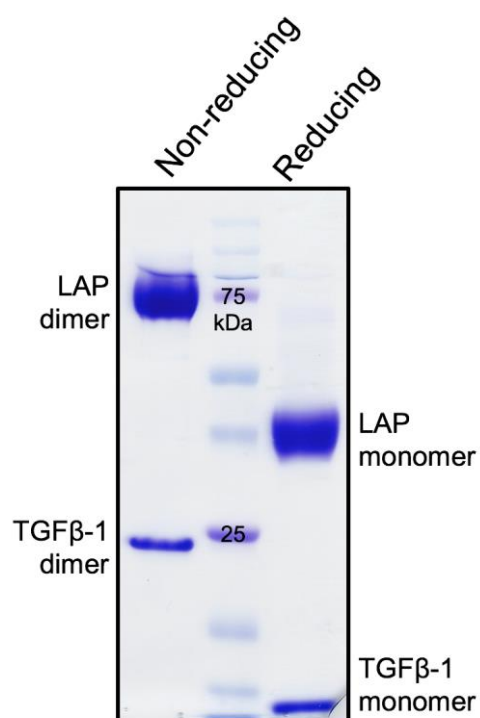**Figure S1** SDS PAGE of recombinant LTGFβ-1 shows high purity and migration of dimers (non-reducing) and monomers (reducing) close to the theoretical molecular weight.

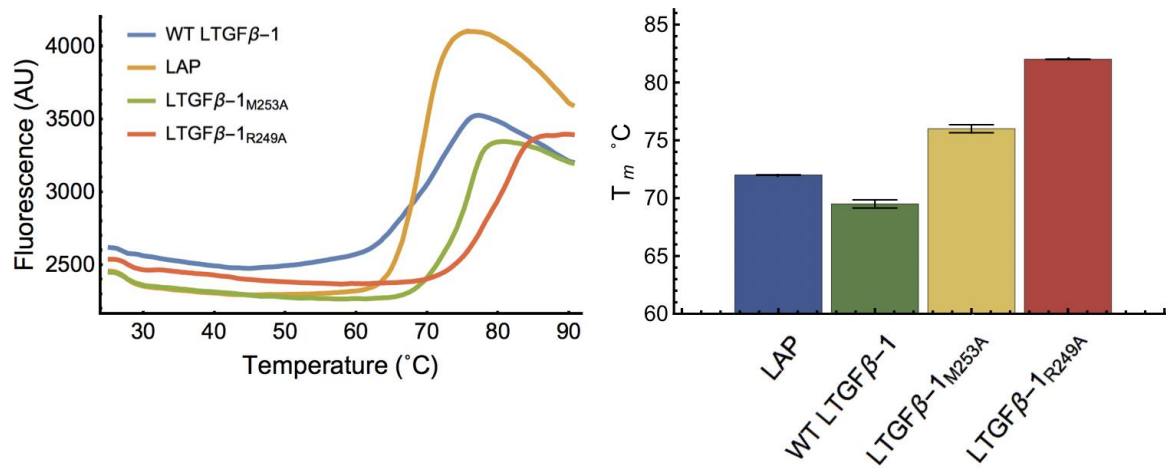

**Figure S2** Thermal shift assay shows that all recombinant proteins are well-folded (a) and that LAP has a similar melting temperature when bound (LTGFβ-1) and unbound to TGFβ-1 (b).

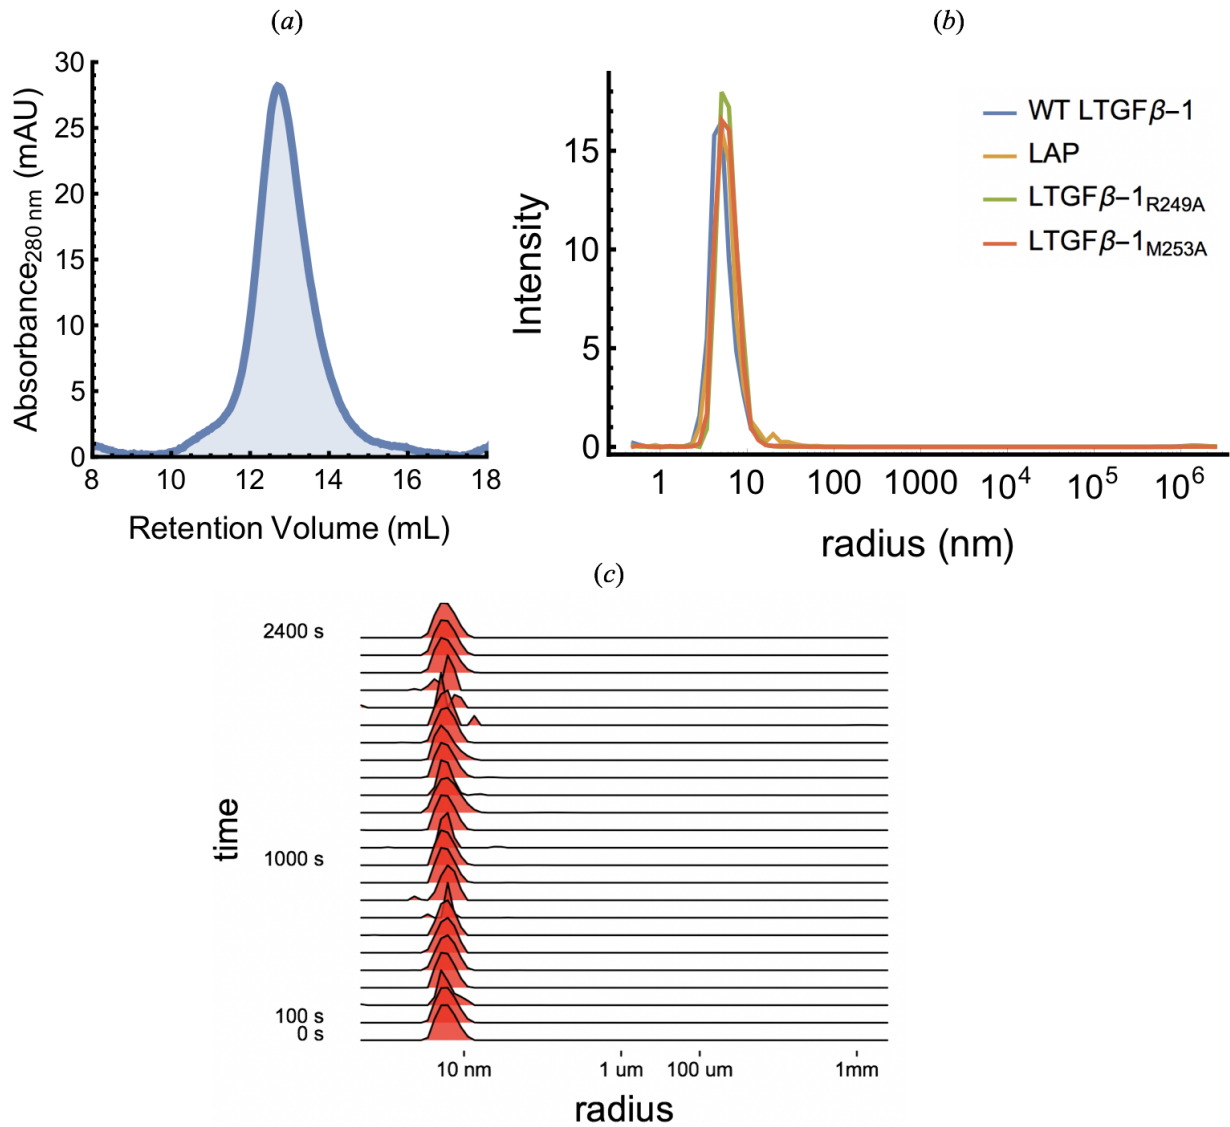

**Figure S3** SEC (a) and DLS (b and c) measurements show a uniform distribution, indicating a monodisperse and aggregate free sample. (a) The protein was purified using a Superdex-200 10/300 with a void volume ( $V_0$ ) of 8 mL and total column volume ( $V_t$ ) of 24 mL. (b) DLS measured approximate hydrodynamic radii ( $R_H$ ) of 4.6, 5.8, 5.3, and 4.7 nm for LTGFβ-1, LTGFβ-1<sub>R249A</sub>, LTGFβ-1<sub>M253A</sub>, and LAP, respectively. (c) Measurements of the size distribution of LTGFβ-1 show that the protein complex is stable on a time frame much larger than the total exposure time of the SAXS experiments.

## References

- Dyer, K. N., Hammel, M., Rambo, R. P., Tsutakawa, S. E., Rodic, I., Classen, S., Tainer, J. A. & Hura, G. L. (2014). *Methods Mol Biol* **1091**, 245-258.
- Franke, D., Petoukhov, M. V., Konarev, P. V., Panjkovich, A., Tuukkanen, A., Mertens, H. D. T., Kikhney, A. G., Hajizadeh, N. R., Franklin, J. M., Jeffries, C. M. & Svergun, D. I. (2017). *Journal of Applied Crystallography* **50**, 1212-1225.
- Gasteiger, E., Hoogland, C., Gattiker, A., Duvaud, S., Wilkins, M. R., Appel, R. D. & Bairoch, A. (2005). *The proteomics protocols handbook*, edited by J. M. Walker, pp. 571-607. Totowa, N.J.: Humana Press.
- Tria, G., Mertens, H. D., Kachala, M. & Svergun, D. I. (2015). *IUCrJ* **2**, 207-217.
- Yang, Z., Lasker, K., Schneidman-Duhovny, D., Webb, B., Huang, C. C., Pettersen, E. F., Goddard, T. D., Meng, E. C., Sali, A. & Ferrin, T. E. (2012). *J Struct Biol* **179**, 269-278.
